# Supplementary material for: The molecular basis of the associations between non-alcoholic fatty liver disease and colorectal cancer
Source: Frontiers journal article supplement (doi:10.3389/fgene.2022.1007337), 2022-12-09
Supplement: Table_2.DOCX [file Table_2.DOCX]

| **MCC** | **MNC** | **EPC** | **Degree** | **BottleNeck** | **Closeness** | **Radiality** |
| --- | --- | --- | --- | --- | --- | --- |
| *IL6* | *IL6* | *IL1B* | *IL6* | *IL6* | *IL6* | *IL6* |
| *JUN* | *FOS* | *IL6* | *FOS* | *MYC* | *IL1B* | *IL1B* |
| *PTGS2* | *IL1B* | *FOS* | *IL1B* | *CXCL1* | *FOS* | *FOS* |
| *CXCL8* | *CXCL8* | *JUN* | *CXCL8* | *MMP9* | *CXCL8* | *CXCL8* |
| *FOS* | *JUN* | *CXCL8* | *JUN* | *JUN* | *JUN* | *MMP9* |
| *IL1B* | *MMP9* | *PTGS2* | *MYC* | *SERPINE1* | *MMP9* | *PTGS2* |
| *MMP9* | *PTGS2* | *MMP9* | *MMP9* | *PTGS2* | *MYC* | *JUN* |
| *EGR1* | *MYC* | *EGR1* | *PTGS2* | *IER3* | *PTGS2* | *MYC* |
| *CXCL1* | *EGR1* | *MYC* | *EGR1* | *TNFAIP6* | *EGR1* | *CXCL1* |
